# Supplementary material
Source: publisher figshare collection journal article supplement (https://acs.figshare.com/ndownloader/files/4129042)
Supplement: Supplementary file 1 [file 4129042]

## Supporting Info

# One-step-process composite colloidal monolayers and further processing aiming at porous membranes

*André Espinha, Marta Ibisate, Juan Galisteo-López, Álvaro Blanco\*, Cefe López*

Instituto de Ciencia de Materiales de Madrid (CSIC)

Sor Juana Inés de la Cruz, 3, 28049 Madrid, Spain.

\*E-mail: [ablanco@icmm.csic.es](mailto:ablanco@icmm.csic.es). Phone: +34-913349000 x. 014

## 2. EXPERIMENTAL SECTION

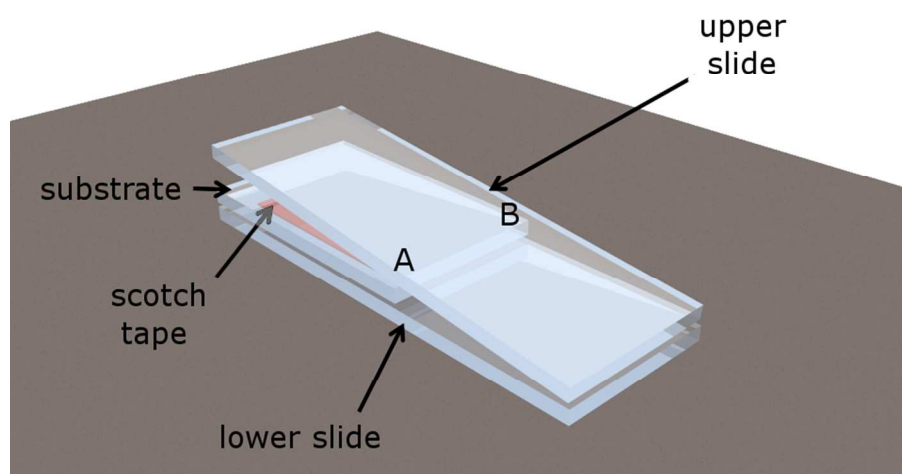

**Schema 1.** A schematic illustration of the wedge shaped cell used for the fabrication of the composite monolayers. Clamps are fixed in positions A and B in order to lock all the components in position. We note that the scotch tape is placed between the lower slide and the substrate.

### 3. RESULTS AND DISCUSSION

#### 3.2 PS spheres in silica matrix by wedge-shaped cell and co-assembly

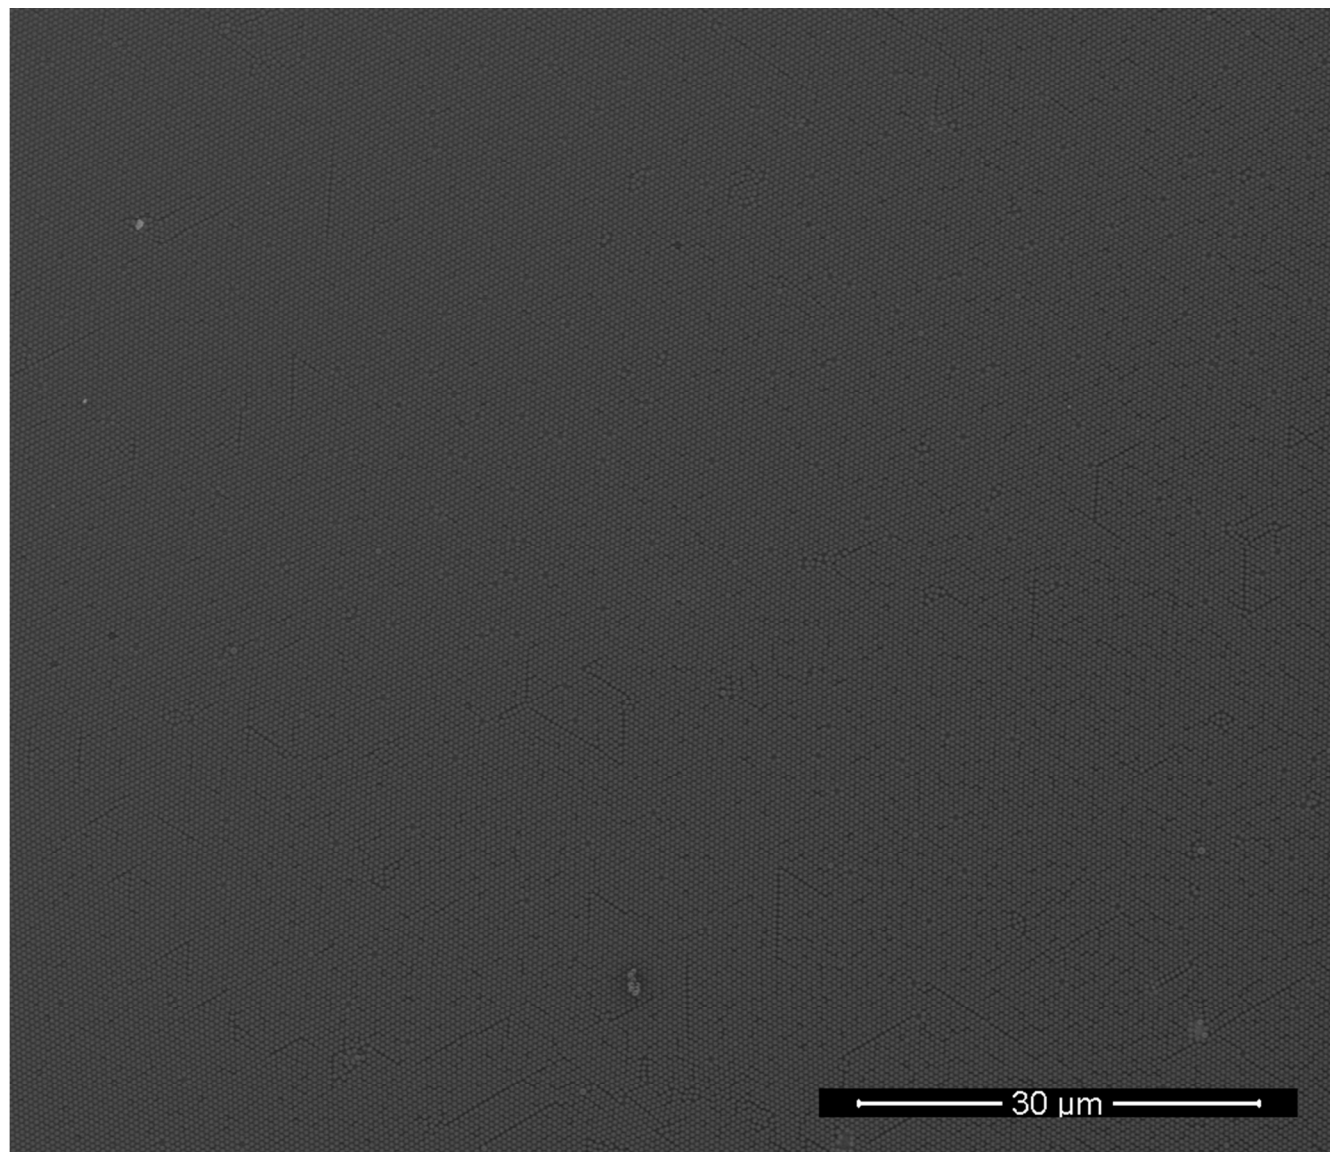

**Figure S1.** Entire SEM image of a sample fabricated with spheres of  $\phi = 430$  nm and  $[\text{TEOS}] = 1.0$  v%.

The area of the monodomain is at least  $8500 \mu\text{m}^2$ .
